# Supplementary material
Source: PubMed Central journal article supplement (PMC5527775)
Supplement: MOL2-2-356-s001.pdf [file MOL2-2-356-s001.pdf]

**The CATS 2C4 monoclonal antibody recognizes specifically the CATS protein**

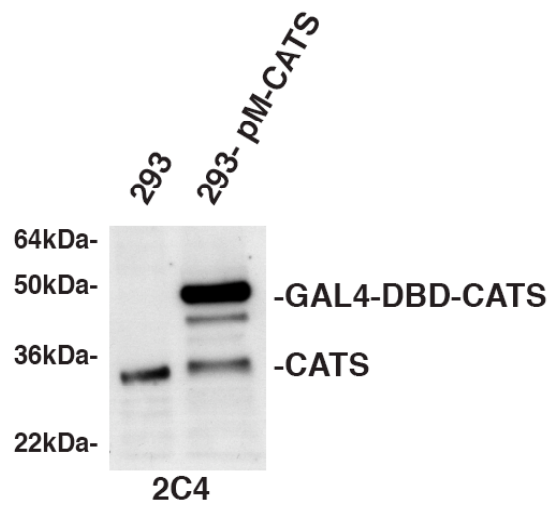

Suppl. Figure 1: Specificity of the  $\alpha$ -CATS 2C4 mAb. 30  $\mu$ g protein of transfected (pM1-CATS construct) and non-transfected HEK 293 cells were blotted and probed with the  $\alpha$ -CATS 2C4 mAb.  $\alpha$ -2C4 recognizes the overexpressed GAL4-DBD-CATS (approx. 42 kDa) and the endogenous CATS (28 kDa) protein.

## CATS is transiently localized at nucleolar structures

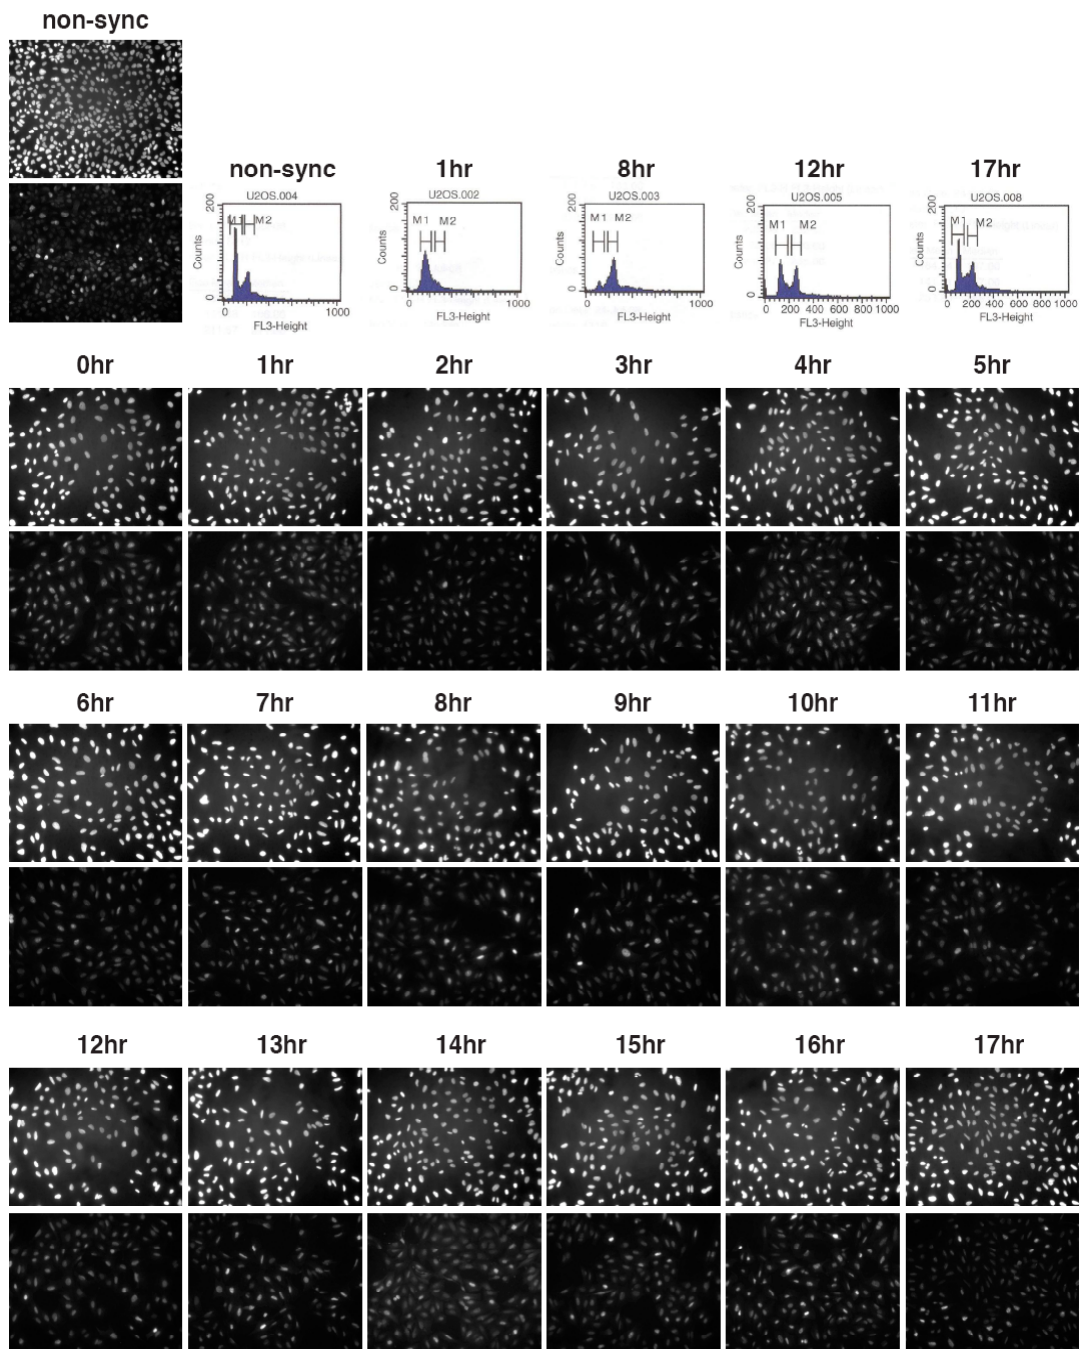

Suppl. Figure 2: CATS nucleolar localization is cell cycle dependent. U2OS cells were synchronized by a double thymidine block. After block release, cells were fixed at hourly intervals, stained with CATS mab and analyzed by fluorescence microscopy. The synchronization was confirmed by flow cytometry, only representative samples are shown. In non-synchronized cells CATS is

heterogeneously expressed and localized at the nucleoli of some cells. CATS accumulates at the nucleoli of most cells from the population synchronized at late G1 phase (0, 1 and 2 hr after block release), whereas the nucleolar localization becomes heterogeneous while the population progressed through the cell cycle and regain their asynchronous state. Upper panels: DAPI staining. Lower panels: CATS staining.
