# Supplementary material
Source: PubMed Central journal article supplement (PMC5527775)

# Suppl Figure 2

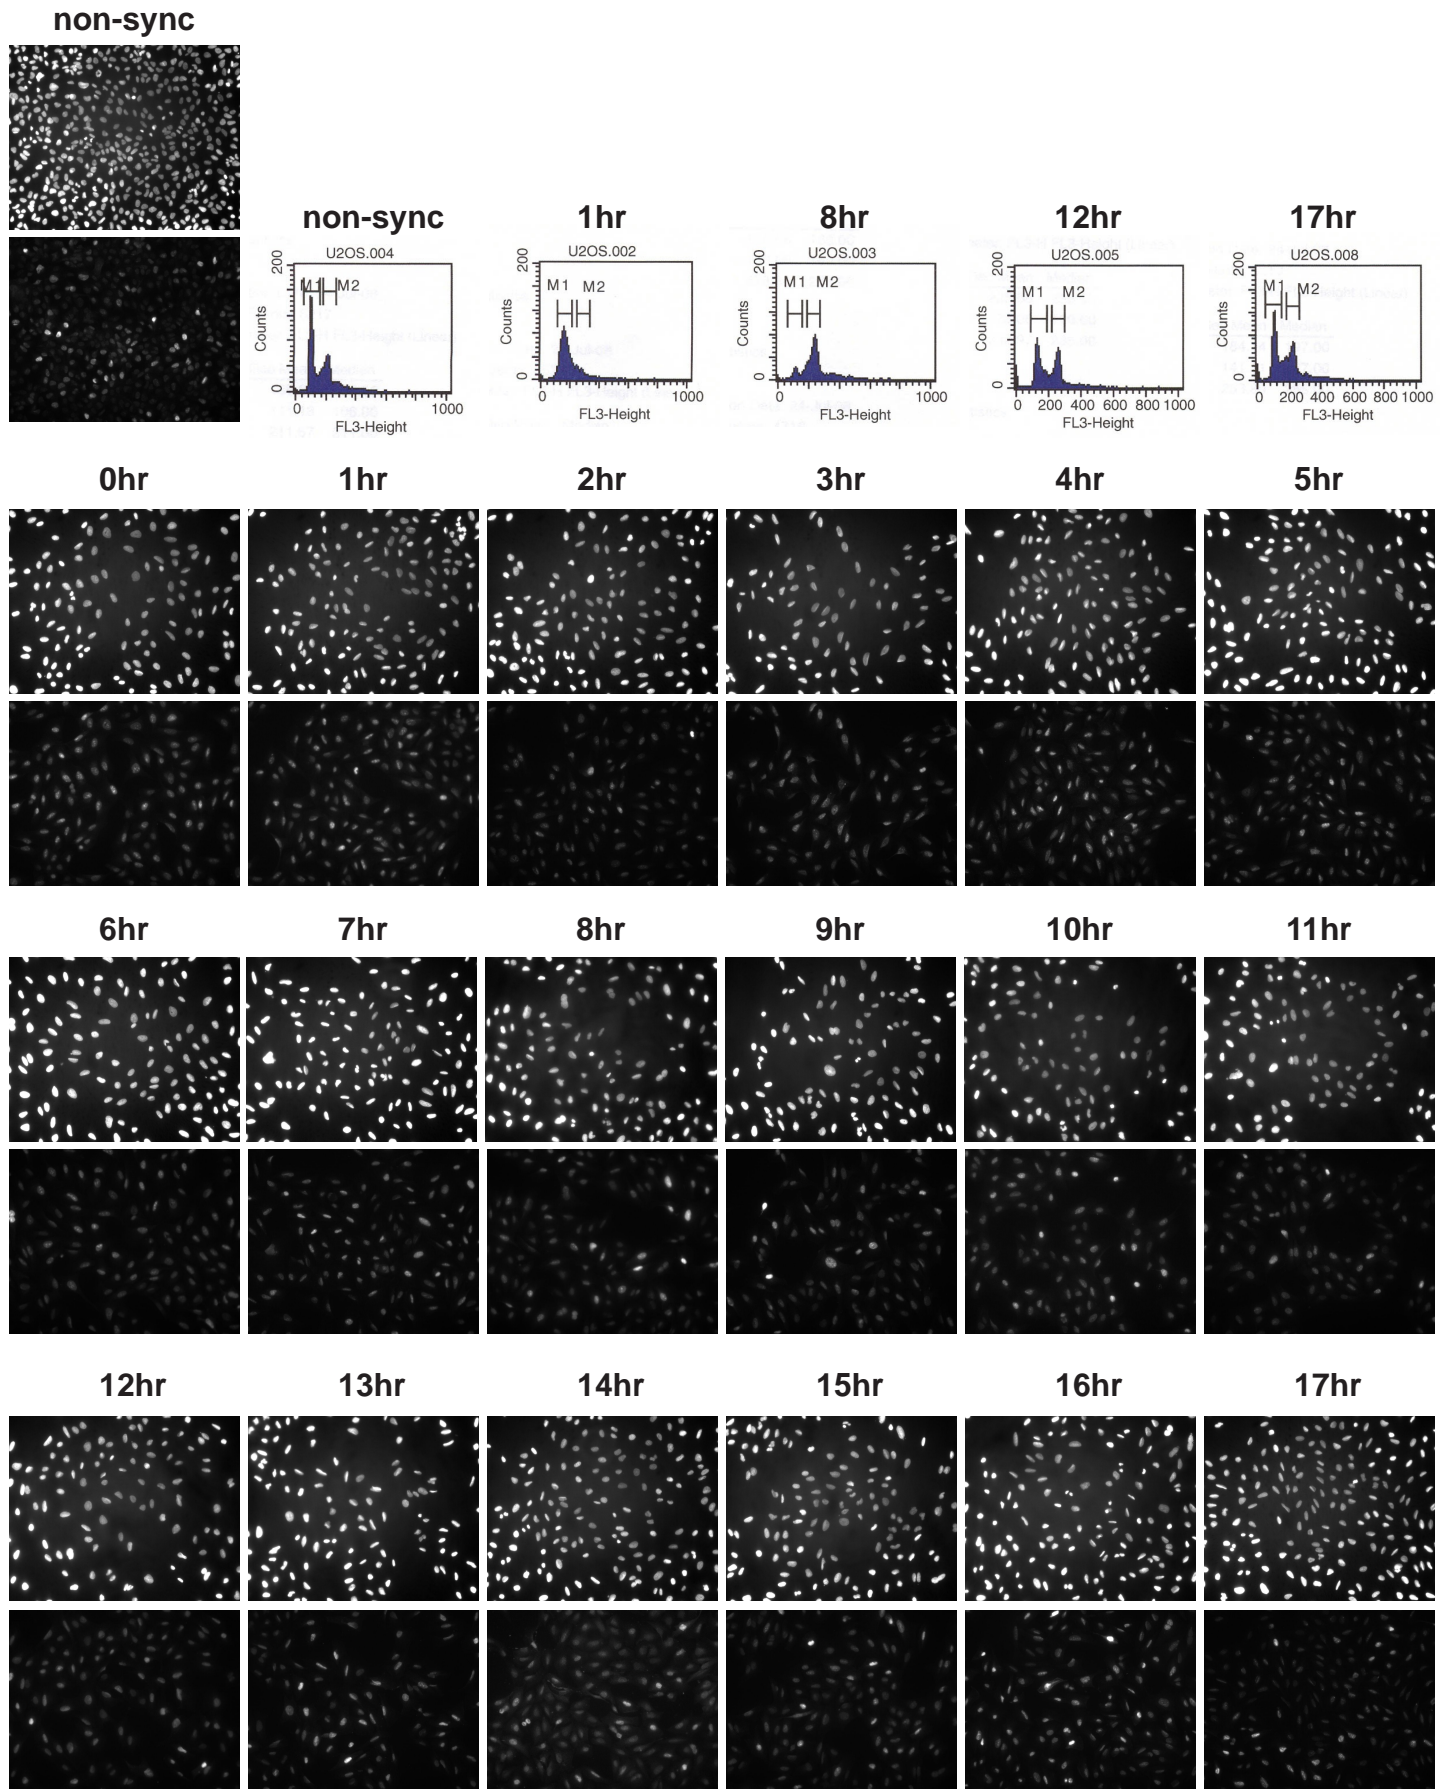

Supplement: MOL2-2-356-s002.pdf [file MOL2-2-356-s002.pdf]
